# Supplementary material for: Exploring the anticancer and antioxidant properties of Vicia faba L. pods extracts, a promising source of nutraceuticals
Source: PeerJ. 2022 Aug 17;10:e13683. doi: 10.7717/peerj.13683 (PMC9392456; doi:10.7717/peerj.13683)
Supplement: Supplemental Information 2 [file peerj-10-13683-s002.xlsx]

## Sheet: A2058
		conc (µg/mL)		a	b	c				conc (µg/mL)		a	b	c				conc (µg/mL)		a	b	c
A2058	VFIa	0		100	100	100		A2058	VFIm	0		100	100	100		A2058	VFIe	0		100	100	100
		50		93.5132	104.142	91.5467				50		99.0485	98.814	99.4389				50		108.304	109.664	103.727
		100		58.5613	52.8765	77.3678				100		95.2643	94.0301	99.2091				100		106.322	99.1098	97.1014
		200		29.5678	29.9587	7.25036				200		94.3921	91.1408	95.0932				200		98.1718	94.0345	84.958
		500		0.94273	10.0246	1.9878				500		90.0125	89.0158	92.1248				500		91.1579	91.1685	84.1987
		VFIa								VFIm								VFIe
a	IC501	126						a	IC501	>500						a	IC501	>500
b	IC502	126.4						b	IC502	>500						b	IC502	>500
c	IC503	125.6						c	IC503	>500						c	IC503	>500
	avg	126							avg	nd							avg	nd
	SD	0.4							SD	nd							SD	nd
		conc (µg/mL)		a	b	c				conc (µg/mL)		a	b	c				conc (µg/mL)		a	b	c
A2058	VFIIa	0		100	100	100		A2058	VFIIm	0		100	100	100		A2058	VFIIe	0		100	100	100
		50		134.802	102.214	87.8882				50		102.269	101.205	102.899				50		101.394	108.721	106.845
		100		88.4185	84.4818	86.7495				100		101.802	100.592	98.9648				100		99.4743	100.992	99.0528
		200		60.0045	59.2302	56.9041				200		99.3392	99.3915	90.6832				200		98.9976	97.9661	97.2266
		500		0.87273	5.99993	9.74993				500		98.4896	98.1897	87.0149				500		97.1499	95.0479	95.1479
		VFIIa								VFIIm								VFIIe
a	IC501	218.5						a	IC501	>500						a	IC501	>500
b	IC502	219.4						b	IC502	>500						b	IC502	>500
c	IC503	217.7						c	IC503	>500						c	IC503	>500
	avg	218.533							avg	nd							avg	nd
	SD	0.85049							SD	nd							SD	nd
		conc (µg/mL)		a	b	c				conc (µg/mL)		a	b	c				conc (µg/mL)		a	b	c
A2058	VFIIIa	0		100	100	100		A2058	VFIIIm	0		100	100	100		A2058	VFIIIe	0		100	100	100
		50		100.181	96.3708	89.182				50		104.132	105.966	106.169				50		105.795	104.073	113.867
		100		68.6403	70.299	74.9972				100		103.716	99.1462	99.8085				100		98.4719	94.0992	99.3197
		200		10.0367	10.6042	4.43286				200		98.2934	97.5509	97.5406				200		93.643	89.0862	95.157
		500		2.01255	1.01579	0.124789				500		96.8496	93.0785	94.7845				500		92.1987	88.8965	91.0542
		VFIIIa								VFIIIm								VFIIIe
a	IC501	120						a	IC501	>500						a	IC501	>500
b	IC502	122.1						b	IC502	>500						b	IC502	>500
c	IC503	121						c	IC503	>500						c	IC503	>500
	avg	121.033							avg	nd							avg	nd
	SD	1.0504							SD	nd							SD	nd
		conc (µg/mL)		a	b	c
A2058	Vinblastine	0		100	100	100
		0.0001		87.2881	98.4314	100.957
		0.0005		87.3823	84.1569	98.9873
		0.001		49.797	32.5863	48.9844
		0.1		36.6171	10.651	19.4512
		Vinblastine
a	IC501	0.00294
b	IC502	0.00081
c	IC503	0.000994
	avg	0.00158133
	SD	1.18023

## Sheet: Sk-Mel28
		conc (µg/mL)		a	b	c				conc (µg/mL)		a	b	c				conc (µg/mL)		a	b	c
Sk-Mel28	VFIa	0		100	100	100		Sk-Mel28	VFIm	0		100	100	100		Sk-Mel28	VFIe	0		100	100	100
		50		65.4867	65.6193	66.7825				50		79.2268	60.76	62.8745				50		63.251	64.1213	66.853
		100		57.429	55.9737	56.7255				100		40.9408	55.243	56.8975				100		59.1523	46.9993	47.2157
		200		45.6451	50.7991	50.1779				200		38.8915	43.7596	40.9865				200		33.2147	44.1981	42.7854
		400		42.7971	40.5746	39.5				400		29.0898	34.3133	29.7854				400		31.9329	35.1414	32.1063
		500		34.7708	33.4673	32.7993				500		26.1078	25.3712	22.4521				500		26.7545	34.2901	31.0225
		VFIa								VFIm								VFIe
a	IC501	171.3						a	IC501	122.1						a	IC501	118.2
b	IC502	173.3						b	IC502	120.7						b	IC502	118.8
c	IC503	172.9						c	IC503	119.7						c	IC503	119.2
	avg	172.5							avg	120.833							avg	118.733
	SD	1.0583							SD	1.20554							SD	0.503322
		conc (µg/mL)		a	b	c				conc (µg/mL)		a	b	c				conc (µg/mL)		a	b	c
Sk-Mel28	VFIIa	0		100	100	100		Sk-Mel28	VFIIm	0		100	100	100		Sk-Mel28	VFIIe	0		100	100	100
		50		70.5882	74.6067	82.8956				50		87.454	71.4607	82.7897				50		64.7518	67.1161	69.1752
		100		68.5662	62.2472	69.7845				100		56.9853	56.6479	60.7452				100		57.4081	52.397	55.4769
		200		60.386	59.5327	62.7965				200		41.796	43.5805	40.5897				200		47.8199	50.6067	50.6896
		400		51.4833	50.7127	49.7427				400		31.1452	39.5094	33.849				400		41.5092	41.9729	40.4443
		500		43.0126	45.608	44.6179				500		28.511	34.3018	25.3558				500		35.9908	35.2435	31.2527
		VFIIa								VFIIm								VFIIe
a	IC501	384.6						a	IC501	171.9						a	IC501	175.2
b	IC502	383.4						b	IC502	170.8						b	IC502	174.4
c	IC503	382.8						c	IC503	169.9						c	IC503	175.8
	avg	383.6							avg	170.867							avg	175.133
	SD	0.916515							SD	1.00167							SD	0.702377
		conc (µg/mL)		a	b	c				conc (µg/mL)		a	b	c				conc (µg/mL)		a	b	c
Sk-Mel28	VFIIIa	0		100	100	100		Sk-Mel28	VFIIIm	0		100	100	100		Sk-Mel28	VFIIIe	0		100	100	100
		50		78.2414	70.8024	72.7462				50		92.1938	77.872	75.9846				50		83.8493	80.8766	84.7964
		100		62.8982	64.0863	61.9698				100		67.8331	68.6815	65.5746				100		74.9578	76.2757	75.7413
		200		55.9574	57.1728	56.1787				200		59.2382	53.1283	53.7845				200		56.8286	59.8218	60.7964
		400		50.1512	47.2559	49.775				400		36.8006	41.7462	42.7865				400		46.5369	42.6566	46.1479
		500		42.8692	44.6243	43.2797				500		32.6142	37.7048	38.7259				500		33.2759	34.929	30.5975
		VFIIIa								VFIIIm								VFIIIe
a	IC501	328.2						a	IC501	255.4						a	IC501	286.8
b	IC502	329.5						b	IC502	256						b	IC502	287.5
c	IC503	327.1						c	IC503	256.9						c	IC503	289.3
	avg	328.267							avg	256.1							avg	287.867
	SD	1.20139							SD	0.754983							SD	1.2897
		conc (µg/mL)		a	b	c
Sk-Mel28	Vinblastine	0		100	100	100
		0.0001		92.7415	91.8965	93.1894
		0.0005		74.1632	81.4631	80.4586
		0.001		58.9986	70.7543	65.8113
		0.1		13.7463	16.8964	12.922
		Vinblastine
a	IC501	0.00114
b	IC502	0.00285
c	IC503	0.00169
	avg	0.00189333
	SD	0.872945

## Sheet: MCF-7
		conc (µg/mL)		a	b	c				conc (µg/mL)		a	b	c				conc (µg/mL)		a	b	c
MCF-7	VFIa	0		100	100	100		MCF-7	VFIm	0		100	100	100		MCF-7	VFIe	0		100	100	100
		50		94.6065	91.7463	96.2587				50		92.3225	90.2587	87.4599				50		89.0595	91.2587	93.4786
		100		81.0096	85.5896	84.1366				100		82.3417	79.8746	74.2599				100		68.1497	70.5969	67.2548
		200		58.0883	58.9789	60.6875				200		60.8051	56.9988	61.3999				200		62.1421	64.499	61.6829
		500		32.5646	30.8795	29.7975				500		46.5674	48.4447	46.5749				500		50.1587	49.3979	51.2746
		VFIa								VFIm								VFIe
a	IC501	277.4						a	IC501	392.1						a	IC501	443.3
b	IC502	278.5						b	IC502	393.3						b	IC502	444.7
c	IC503	278.9						c	IC503	392.9						c	IC503	445.7
	avg	278.267							avg	392.767							avg	444.567
	SD	0.776745							SD	0.61101							SD	1.20554
		conc (µg/mL)		a	b	c				conc (µg/mL)		a	b	c				conc (µg/mL)		a	b	c
MCF-7	VFIIa	0		100	100	100		MCF-7	VFIIm	0		100	100	100		MCF-7	VFIIe	0		100	100	100
		50		97.7159	96.4786	94.1259				50		86.3724	84.1256	81.5863				50		98.2035	95.1287	97.4599
		100		81.19	84.1587	80.1847				100		87.332	82.1487	79.2548				100		95.5036	93.2848	95.2556
		200		72.3608	70.1487	69.148				200		68.5221	72.1447	70.5875				200		85.1506	81.255	84.2567
		500		70.2585	69.2148	67.1248				500		65.1286	69.4786	65.1895				500		73.2149	71.477	69.4855
		VFIIa								VFIIm								VFIIe
a	IC501	>500						a	IC501	>500						a	IC501	>500
b	IC502	>500						b	IC502	>500						b	IC502	>500
c	IC503	>500						c	IC503	>500						c	IC503	>500
	avg	nd							avg	nd							avg	nd
	SD	nd							SD	nd							SD	nd
		conc (µg/mL)		a	b	c				conc (µg/mL)		a	b	c				conc (µg/mL)		a	b	c
MCF-7	VFIIIa	0		100	100	100		MCF-7	VFIIIm	0		100	100	100		MCF-7	VFIIIe	0		100	100	100
		50		91.6573	90.4786	95.4754				50		99.7113	97.4259	95.4479				50		91.1497	89.1467	92.4778
		100		79.296	75.247	78.4598				100		77.8422	75.6689	73.8549				100		81.6916	79.4479	77.5855
		200		57.2786	57.146	59.7758				200		55.4678	60.72	58.3965				200		56.4991	61.7179	58.3656
		500		40.5986	41.6848	39.5459				500		43.7456	41.3459	42.6995				500		41.6956	39.3296	41.5459
		VFIIIa								VFIIIm								VFIIIe
a	IC501	317.5						a	IC501	330.5						a	IC501	325.9
b	IC502	318.6						b	IC502	332.2						b	IC502	327.7
c	IC503	319.3						c	IC503	329.7						c	IC503	326.6
	avg	318.467							avg	330.8							avg	326.733
	SD	0.907377							SD	1.27671							SD	0.907377
		conc (µg/mL)		a	b	c
MCF-7	Vinblastine	0		100	100	100
		0.0005		98.681	97.9764	96.9746
		0.001		73.9224	71.8965	75.4415
		0.1		44.1086	43.9745	42.4661
		1		10.2976	13.2445	11.9764
		Vinblastine
a	IC501	0.0375
b	IC502	0.0368
c	IC503	0.0362
	avg	0.0368333
	SD	0.650641

## Sheet: MDA-MB-231
		conc (µg/mL)		a	b	c				conc (µg/mL)		a	b	c				conc (µg/mL)		a	b	c
MDA-MB-231	VFIa	0		100	100	100		MDA-MB-231	VFIm	0		100	100	100		MDA-MB-231	VFIe	0		100	100	100
		50		90.2174	89.2488	88.96				50		99.1304	98.479	97.5581				50		87.6087	99.4797	86.549
		100		68.3043	67.5978	65.9497				100		99.3478	87.5479	83.2478				100		86.9565	76.4556	75.4897
		200		51.9165	52.6699	54.688				200		81.7609	80.9549	69.85				200		60.6957	69.1256	65.2445
		500		40.4146	39.9878	38.9899				500		47.1499	46.8894	49.5086				500		46.737	44.9845	45.2548
		VFIa								VFIm								VFIe
a	IC501	272.1						a	IC501	466.5						a	IC501	403.1
b	IC502	270.8						b	IC502	468.2						b	IC502	403.7
c	IC503	269.6						c	IC503	467.2						c	IC503	402.3
	avg	270.833							avg	467.3							avg	403.033
	SD	1.25033							SD	0.8544							SD	0.702377
		conc (µg/mL)		a	b	c				conc (µg/mL)		a	b	c				conc (µg/mL)		a	b	c
MDA-MB-231	VFIIa	0		100	100	100		MDA-MB-231	VFIIm	0		100	100	100		MDA-MB-231	VFIIe	0		100	100	100
		50		98.0998	97.15	94.2589				50		98.5748	104.513	105.49				50		98.2609	97.57	95.4486
		100		90.9739	87.257	88.1445				100		96.4897	98.6672	97.5579				100		96.3478	94.2566	89.5745
		200		87.6484	84.1245	84.5516				200		94.5649	87.5574	85.1288				200		89.3478	87.5632	88.1656
		500		74.1248	72.4855	75.2611				500		81.5613	78.4894	79.5335				500		81.4753	82.5947	79.4585
		VFIIa								VFIIm								VFIIe
a	IC501	>500						a	IC501	>500						a	IC501	>500
b	IC502	>500						b	IC502	>500						b	IC502	>500
c	IC503	>500						c	IC503	>500						c	IC503	>500
	avg	nd							avg	nd							avg	nd
	SD	nd							SD	nd							SD	nd
		conc (µg/mL)		a	b	c				conc (µg/mL)		a	b	c				conc (µg/mL)		a	b	c
MDA-MB-231	VFIIIa	0		100	100	100		MDA-MB-231	VFIIIm	0		100	100	100		MDA-MB-231	VFIIIe	0		100	100	100
		50		92.3753	95.4896	94.8975				50		112.352	102.479	105.749				50		99.7625	94.4578	95.479
		100		74.886	76.3598	76.1697				100		106.176	98.2367	96.57				100		92.8504	91.6356	87.46
		200		49.6449	46.2097	43.697				200		98.7787	88.4796	89.4777				200		84.0855	86.4897	82.6697
		500		29.8974	32.4255	34.5897				500		93.1651	84.1865	83.5548				500		79.459	76.2987	74.26
		VFIIIa								VFIIIm								VFIIIe
a	IC501	228.4						a	IC501	>500						a	IC501	>500
b	IC502	230.3						b	IC502	>500						b	IC502	>500
c	IC503	229.7						c	IC503	>500						c	IC503	>500
	avg	229.467							avg	nd							avg	nd
	SD	0.971253							SD	nd							SD	nd
		conc (µg/mL)		a	b	c
MDA-MB-231	Vinblastine	0		100	100	100
		0.001		98.2976	97.4631	96.4613
		0.01		87.5474	85.9746	80.7461
		0.1		53.7984	56.7261	58.5661
		1		19.5893	15.7446	16.7946
		Vinblastine
a	IC501	0.1313
b	IC502	0.1301
c	IC503	0.1292
	avg	0.1302
	SD	1.05357

## Sheet: HeLa
		conc (µg/mL)		a	b	c				conc (µg/mL)		a	b	c				conc (µg/mL)		a	b	c
HeLa	VFIa	0		100	100	100		HeLa	VFIm	0		100	100	100		HeLa	VFIe	0		100	100	100
		50		109.105	92.8153	98.48				50		85.1438	78.1525	87.2578				50		96.7093	97.9472	99.457
		100		71.4057	99.5601	86.2448				100		115.495	106.012	99.2647				100		74.9073	76.0997	79.5686
		200		56.3898	55.1848	53.8941				200		67.4121	61.8768	69.4462				200		43.7308	39.153	37.9722
		400		43.658	33.2628	38.5975				400		64.5879	61.8768	65.4688				400		31.1174	33.103	29.9679
		500		18.2685	15.1918	19.9699				500		65.179	61.8768	57.2355				500		24.2741	27.153	28.9977
		VFIa								VFIm								VFIe
a	IC501	252.7						a	IC501	>500						a	IC501	208.2
b	IC502	253.9						b	IC502	>500						b	IC502	209.1
c	IC503	254.1						c	IC503	>500						c	IC503	209.8
	avg	253.567							avg	nd							avg	209.033
	SD	0.757188							SD	nd							SD	0.802081
		conc (µg/mL)		a	b	c				conc (µg/mL)		a	b	c				conc (µg/mL)		a	b	c
HeLa	VFIIa	0		100	100	100		HeLa	VFIIm	0		100	100	100		HeLa	VFIIe	0		100	100	100
		50		85.4633	113.747	99.5716				50		123.802	151.582	110.45				50		94.9548	115.669	99.2345
		100		88.0192	118.248	97.4595				100		96.23	128.832	102.457				100		94.137	119.927	98.2657
		200		56.7093	92.944	94.5699				200		83.0671	98.8199	99.137				200		92.3699	114.234	99.4569
		400		58.1595	89.1727	81.4588				400		81.1595	99.7105	98.2548				400		81.255	96.6423	87.5532
		500		54.1446	63.747	60.156				500		84.1656	99.2141	93.4115				500		74.2336	97.2749	81.2595
		VFIIa								VFIIm								VFIIe
a	IC501	>500						a	IC501	>500						a	IC501	>500
b	IC502	>500						b	IC502	>500						b	IC502	>500
c	IC503	>500						c	IC503	>500						c	IC503	>500
	avg	nd							avg	nd							avg	nd
	SD	nd							SD	nd							SD	nd
		conc (µg/mL)		a	b	c				conc (µg/mL)		a	b	c				conc (µg/mL)		a	b	c
HeLa	VFIIIa	0		100	100	100		HeLa	VFIIIm	0		100	100	100		HeLa	VFIIIe	0		100	100	100
		50		75.726	77.839	81.2567				50		90.4383	105.094	111.27				50		98.9863	103.54	97.227
		100		52.7123	62.3085	56.4997				100		89.8904	94.5865	99.5478				100		87.3425	99.6681	98.4689
		200		39.9726	29.3068	32.5911				200		76.1644	91.0143	97.5694				200		84.5206	97.1996	96.2354
		400		30.7968	26.7839	27.46				400		74.2446	81.4995	91.3666				400		81.2561	90.5072	91.4577
		500		16.5862	13.4509	15.2699				500		73.6987	77.5965	88.4985				500		79.4897	86.2844	82.557
		VFIIIa								VFIIIm								VFIIIe
a	IC501	132.5						a	IC501	>500						a	IC501	>500
b	IC502	132.1						b	IC502	>500						b	IC502	>500
c	IC503	133.2						c	IC503	>500						c	IC503	>500
	avg	132.6							avg	nd							avg	nd
	SD	0.556776							SD	nd							SD	nd
		conc (µg/mL)		a	b	c
HeLa	Vinblastine	0		100	100	100
		0.0005		96.4165	95.0561	98.9475
		0.001		85.8465	83.3466	82.8965
		0.1		47.9845	46.6813	50.9965
		1		33.4651	35.2094	32.2892
		Vinblastine
a	IC501	0.0543
b	IC502	0.0557
c	IC503	0.0559
	avg	0.0553
	SD	0.87178

## Sheet: Ishikawa
		conc (µg/mL)		a	b	c				conc (µg/mL)		a	b	c				conc (µg/mL)		a	b	c
Ishikawa	VFIa	0		100	100	100		Ishikawa	VFIm	0		100	100	100		Ishikawa	VFIe	0		100	100	100
		50		99.9833	97.1587	97.5622				50		106.669	99.4597	101.259				50		101.883	98.7758	101.258
		100		98.3849	96.8161	95.2369				100		105.23	98.7413	99.5689				100		99.4644	97.1489	97.2545
		200		84.5188	88.1145	91.26				200		98.7071	98.1278	98.5555				200		98.8075	96.5569	95.4456
		500		83.255	85.264	84.2366				500		94.2865	86.3699	91.5874				500		91.1897	87.1479	90.15
		VFIa								VFIm								VFIe
a	IC501	>500						a	IC501	>500						a	IC501	>500
b	IC502	>500						b	IC502	>500						b	IC502	>500
c	IC503	>500						c	IC503	>500						c	IC503	>500
	avg	nd							avg	nd							avg	nd
	SD	nd							SD	nd							SD	nd
		conc (µg/mL)		a	b	c				conc (µg/mL)		a	b	c				conc (µg/mL)		a	b	c
Ishikawa	VFIIa	0		100	100	100		Ishikawa	VFIIm	0		100	100	100		Ishikawa	VFIIe	0		100	100	100
		50		99	99.4588	97.237				50		101.131	99.4587	99.8745				50		109.414	99.4578	97.2557
		100		98	95.6974	96.7841				100		99.1599	97.2399	98.2588				100		99.4686	96.159	96.2145
		200		85.6335	95.1437	97.1698				200		98.4799	96.4578	98.1006				200		98.5941	95.1277	94.4867
		500		84.126	87.1596	88.4591				500		95.2367	90.2215	93.1578				500		85.2865	84.16	82.1855
		VFIIa								VFIIm								VFIIe
a	IC501	>500						a	IC501	>500						a	IC501	>500
b	IC502	>500						b	IC502	>500						b	IC502	>500
c	IC503	>500						c	IC503	>500						c	IC503	>500
	avg	nd							avg	nd							avg	nd
	SD	nd							SD	nd							SD	nd
		conc (µg/mL)		a	b	c				conc (µg/mL)		a	b	c				conc (µg/mL)		a	b	c
Ishikawa	VFIIIa	0		100	100	100		Ishikawa	VFIIIm	0		100	100	100		Ishikawa	VFIIIe	0		100	100	100
		50		99.0448	98.4595	97.1554				50		101.259	99.1258	98.4578				50		108.265	99.4589	99.2584
		100		98.7213	97.1246	95.2396				100		99.1288	98.1555	96.4511				100		98.4678	96.1456	97.1299
		200		77.7778	81.264	79.1248				200		97.1449	93.1587	91.2582				200		98.0507	91.357	96.1476
		500		75.2285	79.4582	75.9659				500		95.1256	89.1257	87.1549				500		91.2651	85.1557	87.1367
		VFIIIa								VFIIIm								VFIIIe
a	IC501	>500						a	IC501	>500						a	IC501	>500
b	IC502	>500						b	IC502	>500						b	IC502	>500
c	IC503	>500						c	IC503	>500						c	IC503	>500
	avg	nd							avg	nd							avg	nd
	SD	nd							SD	nd							SD	nd
		conc (µg/mL)		a	b	c
Ishikawa	Vinblastine	0		100	100	100
		0.0005		85.7724	81.2248	84.8651
		0.001		73.7029	71.4651	74.7513
		0.1		39.5946	45.9699	41.8851
		1		9.70362	8.04986	7.89651
		Vinblastine
a	IC501	0.0208
b	IC502	0.0211
c	IC503	0.0222
	avg	0.0213667
	SD	0.737111

## Sheet: RKO
		conc (µg/mL)		a	b	c				conc (µg/mL)		a	b	c				conc (µg/mL)		a	b	c
RKO	VFIa	0		100	100	100		RKO	VFIm	0		100	100	100		RKO	VFIe	0		100	100	100
		50		115.445	101.259	100.255				50		97.5567	99.1084	105.15				50		99.8517	99.1478	101.257
		100		115.794	98.2687	99.1025				100		101.92	99.8741	101.26				100		92.3211	98.1246	94.1569
		200		81.2391	98.1032	94.1479				200		95.6719	94.1587	98.1479				200		91.7452	99.6675	91.4861
		500		81.2185	84.0148	85.1485				500		91.2585	90.2175	91.2585				500		87.1145	93.8663	87.0015
		VFIa								VFIm								VFIe
a	IC501	>500						a	IC501	>500						a	IC501	>500
b	IC502	>500						b	IC502	>500						b	IC502	>500
c	IC503	>500						c	IC503	>500						c	IC503	>500
	avg	nd							avg	nd							avg	nd
	SD	nd							SD	nd							SD	nd
		conc (µg/mL)		a	b	c				conc (µg/mL)		a	b	c				conc (µg/mL)		a	b	c
RKO	VFIIa	0		100	100	100		RKO	VFIIm	0		100	100	100		RKO	VFIIe	0		100	100	100
		50		103.665	106.458	102.458				50		101.274	99.3655	102.362				50		101.359	99.5621	98.5677
		100		101.719	98.1246	98.3654				100		97.9014	98.4567	101.259				100		97.9609	97.1067	94.2667
		200		97.8534	97.2544	95.1201				200		96.3721	94.2251	99.2659				200		95.5293	95.4125	91.2589
		500		91.2011	90.2596	89.1467				500		92.0288	89.4685	95.4578				500		91.2567	90.2367	85.2367
		VFIIa								VFIIm								VFIIe
a	IC501	>500						a	IC501	>500						a	IC501	>500
b	IC502	>500						b	IC502	>500						b	IC502	>500
c	IC503	>500						c	IC503	>500						c	IC503	>500
	avg	nd							avg	nd							avg	nd
	SD	nd							SD	nd							SD	nd
		conc (µg/mL)		a	b	c				conc (µg/mL)		a	b	c				conc (µg/mL)		a	b	c
RKO	VFIIIa	0		100	100	100		RKO	VFIIIm	0		100	100	100		RKO	VFIIIe	0		100	100	100
		50		111.64	102.367	98.7422				50		103.823	99.259	98.4575				50		96.8564	101.985	99.2597
		100		99.5149	98.1459	95.2563				100		101.993	96.2895	97.8965				100		97.1963	99.1575	95.2148
		200		93.8828	95.2367	90.2148				200		99.8556	95.8942	96.2584				200		93.7978	95.8742	91.5875
		500		90.4589	89.1255	85.37				500		91.2567	85.9846	85.237				500		87.2741	88.9623	87.6956
		VFIIIa								VFIIIm								VFIIIe
a	IC501	>500						a	IC501	>500						a	IC501	>500
b	IC502	>500						b	IC502	>500						b	IC502	>500
c	IC503	>500						c	IC503	>500						c	IC503	>500
	avg	nd							avg	nd							avg	nd
	SD	nd							SD	nd							SD	nd
		conc (µg/mL)		a	b	c
RKO	Vinblastine	0		100	100	100
		0.01		96.9474	94.8651	94.6665
		0.1		74.3792	77.1651	77.0186
		1		50.1873	48.8456	49.019
		5		7.78947	5.89513	6.10965
		Vinblastine
a	IC501	0.6283
b	IC502	0.6301
c	IC503	0.6308
	avg	0.629733
	SD	1.2897

## Sheet: MCF-10A
		conc (µg/mL)		a	b	c				conc (µg/mL)		a	b	c				conc (µg/mL)		a	b	c
MCF-10A	VFIa	0		100	100	100		MCF-10A	VFIm	0		100	100	100		MCF-10A	VFIe	0		100	100	100
		50		99.6454	98.1456	95.5448				50		116.135	105.259	99.4986				50		112.057	105.26	99.2548
		100		28.6078	33.1745	31.4584				100		108.688	99.1575	99.01				100		112.766	99.2655	97.3655
		200		16.744	14.4699	18.9567				200		99.0709	97.1561	97.3577				200		107.535	98.0143	96.1244
		400		13.0071	13.5749	11.8651				400		94.4575	93.2465	92.4899				400		99.7518	96.3645	95.3367
		500		10.1064	11.7467	8.95785				500		91.5071	93.0147	91.9986				500		98.039	93.1561	91.6696
		VFIa								VFIm								VFIe
a	IC501	86.7						a	IC501	>500						a	IC501	>500
b	IC502	88.1						b	IC502	>500						b	IC502	>500
c	IC503	87						c	IC503	>500						c	IC503	>500
	avg	87.2667							avg	nd							avg	nd
	SD	0.737111							SD	nd							SD	nd
		conc (µg/mL)		a	b	c				conc (µg/mL)		a	b	c				conc (µg/mL)		a	b	c
MCF-10A	VFIIa	0		100	100	100		MCF-10A	VFIIm	0		100	100	100		MCF-10A	VFIIe	0		100	100	100
		50		111.298	98.5977	101.266				50		104.567	99.2574	97.2156				50		104.106	101.215	99.2595
		100		88.3814	85.3648	90.3399				100		102.324	95.64	95.37				100		99.8878	98.4578	95.2699
		200		76.3026	75.2369	77.2155				200		100.801	94.4113	94.1255				200		95.3173	94.3665	94.237
		400		28.1954	41.199	40.0958				400		91.8269	90.249	92.1865				400		92.9583	91.2566	92.1048
		500		44.9519	34.4997	31.2785				500		93.3494	86.216	85.3585				500		87.1891	89.8655	85.2817
		VFIIa								VFIIm								VFIIe
a	IC501	339.5						a	IC501	>500						a	IC501	>500
b	IC502	341.7						b	IC502	>500						b	IC502	>500
c	IC503	340.1						c	IC503	>500						c	IC503	>500
	avg	340.433							avg	nd							avg	nd
	SD	1.13725							SD	nd							SD	nd
		conc (µg/mL)		a	b	c				conc (µg/mL)		a	b	c				conc (µg/mL)		a	b	c
MCF-10A	VFIIIa	0		100	100	100		MCF-10A	VFIIIm	0		100	100	100		MCF-10A	VFIIIe	0		100	100	100
		50		93.997	89.2597	85.2892				50		109.802	99.5263	98.257				50		106.763	101.266	103.248
		100		25.3398	27.1746	25.8165				100		105.015	98.1255	95.3215				100		101.295	99.3625	100.264
		200		20.6428	18.5652	19.9556				200		104.331	95.3659	91.2842				200		99.1155	95.1456	97.2652
		400		15.31	16.5846	13.9817				400		94.3009	92.6657	90.3666				400		98.8754	91.2548	95.6641
		500		14.2097	12.8156	10.9982				500		97.4924	87.5133	83.2345				500		95.2644	85.2589	91.2549
		VFIIIa								VFIIIm								VFIIIe
a	IC501	81.7						a	IC501	>500						a	IC501	>500
b	IC502	82.9						b	IC502	>500						b	IC502	>500
c	IC503	81.9						c	IC503	>500						c	IC503	>500
	avg	82.1667							avg	nd							avg	nd
	SD	0.64291							SD	nd							SD	nd
		conc (µg/mL)		a	b	c
MCF-10A	Vinblastine	0		100	100	100
		0.0005		85.1764	80.4856	82.4466
		0.001		71.9632	70.3658	73.6699
		0.1		36.9364	42.2115	40.1148
		1		9.12525	8.65987	6.96431
		Vinblastine
a	IC501	0.0168
b	IC502	0.017
c	IC503	0.0179
	avg	0.0172333
	SD	0.585947

## Sheet: Hek-293
		conc (µg/mL)		a	b	c				conc (µg/mL)		a	b	c				conc (µg/mL)		a	b	c
Hek-293	VFIa	0		100	100	100		Hek-293	VFIm	0		100	100	100		Hek-293	VFIe	0		100	100	100
		50		22.3192	20.7349	27.2568				50		98.6456	97.2655	98.5677				50		99.9789	98.5412	99.6521
		100		7.51055	6.46451	12.5313				100		94.3671	94.2356	95.3699				100		94.1772	93.217	95.3655
		200		2.36287	1.86513	4.3513				200		92.6582	91.2548	91.2587				200		88.7764	85.2367	88.1499
		400		2.27848	0.945514	2.76451				400		83.2911	89.6657	87.3655				400		84.5359	82.15	84.5699
		500		2.27848	0.247651	0.876453				500		81.8819	82.3357	84.2699				500		78.7342	76.1499	79.6689
		VFIa								VFIm								VFIe
a	IC501	23.5						a	IC501	>500						a	IC501	>500
b	IC502	24.6						b	IC502	>500						b	IC502	>500
c	IC503	25.2						c	IC503	>500						c	IC503	>500
	avg	24.4333							avg	nd							avg	nd
	SD	0.862168							SD	nd							SD	nd
		conc (µg/mL)		a	b	c				conc (µg/mL)		a	b	c				conc (µg/mL)		a	b	c
Hek-293	VFIIa	0		100	100	100		Hek-293	VFIIm	0		100	100	100		Hek-293	VFIIe	0		100	100	100
		50		90.566	95.215	97.1487				50		94.9057	98.249	99.5472				50		97.8113	98.5413	99.7437
		100		84.2264	86.7463	81.7466				100		84.6038	95.8651	95.3276				100		94.6038	96.7459	95.746
		200		65.8936	75.148	72.7485				200		80.3774	95.8947	91.6657				200		92.7925	94.5587	89.2248
		400		60.2453	62.6967	65.7257				400		77.6604	87.8465	89.479				400		84.7547	81.6986	84.457
		500		47.3962	45.1245	42.5067				500		77.9623	86.9895	84.6985				500		82.6415	78.5542	80.7896
		VFIIa								VFIIm								VFIIe
a	IC501	498.5						a	IC501	>500						a	IC501	>500
b	IC502	497.3						b	IC502	>500						b	IC502	>500
c	IC503	496.5						c	IC503	>500						c	IC503	>500
	avg	497.433							avg	nd							avg	nd
	SD	1.00664							SD	nd							SD	nd
		conc (µg/mL)		a	b	c				conc (µg/mL)		a	b	c				conc (µg/mL)		a	b	c
Hek-293	VFIIIa	0		100	100	100		Hek-293	VFIIIm	0		100	100	100		Hek-293	VFIIIe	0		100	100	100
		50		94.0572	99.7417	96.7842				50		103.668	101.897	99.7846				50		99.6361	98.6975	101.875
		100		78.1365	75.8766	73.5125				100		95.4512	99.8947	98.9875				100		99.1739	97.7842	99.7582
		200		56.8403	50.8747	51.5551				200		97.9457	94.8947	95.4865				200		95.4512	94.4852	96.7356
		400		37.9841	41.0985	46.9485				400		88.9949	90.8651	93.8153				400		90.4864	90.6785	94.1458
		500		25.4248	27.9524	22.8984				500		89.5818	87.6532	87.8952				500		85.5979	86.7865	89.8542
		VFIIIa								VFIIIm								VFIIIe
a	IC501	254.9						a	IC501	>500						a	IC501	>500
b	IC502	254						b	IC502	>500						b	IC502	>500
c	IC503	252.6						c	IC503	>500						c	IC503	>500
	avg	253.833							avg	nd							avg	nd
	SD	1.15902							SD	nd							SD	nd
		conc (µg/mL)		a	b	c
Hek-293	Vinblastine	0		100	100	100
		0.0005		96.4355	95.9567	96.7828
		0.001		72.5468	70.5435	73.8453
		0.1		43.8765	43.5568	42.7822
		1		9.64454	13.5472	11.7864
		Vinblastine
a	IC501	0.0328
b	IC502	0.0331
c	IC503	0.0346
	avg	0.0335
	SD	0.964365
