# Supplementary material for: Exploring the anticancer and antioxidant properties of Vicia faba L. pods extracts, a promising source of nutraceuticals
Source: PeerJ. 2022 Aug 17;10:e13683. doi: 10.7717/peerj.13683 (PMC9392456; doi:10.7717/peerj.13683)
Supplement: Supplemental Information 3 [file peerj-10-13683-s003.xlsx]

## Sheet: Water content
Water content
Sample	Not freeze-dried (g)	Freeze-dried (g)	Water content (%)
VFI	100	49.52	57.64
VFII	100	11.04	85.43
VFIII	100	12.53	85.8

## Sheet: TPC
			Totale phenolc content (TPC): Folin-Ciocalteu
									GAE (gallic acid equivalent)
VFI (first collection)									VFI (first collection)
MeOH
mg/mL	µg/mL	Abs1	Abs2	Abs3	Mean value	SD			mg/mL	µg/mL	Y1	Y2	Y3	Mean value	SD
1	33.3	0.606	0.584	0.606	0.598667	0.0127017			1	33.3	0.166526	0.160516	0.166526	0.164522	0.00346975
Acetone									Acetone
mg/mL	µg/mL	Abs1	Abs2	Abs3	Mean value	SD			mg/mL	µg/mL	Y1	Y2	Y3	Mean value	SD
1	33.3	0.267	0.315	0.308	0.296667	0.0259294			1	33.3	0.0739203	0.0870325	0.0851203	0.0820244	0.00708318
70% EtOH									70% EtOH
mg/mL	µg/mL	Abs1	Abs2	Abs3	Mean value	SD			mg/mL	µg/mL	Y1	Y2	Y3	Mean value	SD
1	33.3	0.678	0.773	0.778	0.743	0.0563471			1	33.3	0.186194	0.212145	0.213511	0.20395	0.0153924
VFII (second collection)									VFII (second collection)
MeOH									MeOH
mg/mL	µg/mL	Abs1	Abs2	Abs3	Mean value	SD			mg/mL	µg/mL	Y1	Y2	Y3	Mean value	SD
1	33.3	0.204	0.21	0.203	0.205667	0.00378594			1	33.3	0.0567105	0.0583495	0.0564373	0.0571658	0.00103421
Acetone									Acetone
mg/mL	µg/mL	Abs1	Abs2	Abs3	Mean value	SD			mg/mL	µg/mL	Y1	Y2	Y3	Mean value	SD
1		0.808	0.746	0.822	0.792	0.0404475			1	33.3	0.221706	0.20477	0.225531	0.217335	0.0110491
70% EtOH									70% EtOH
mg/mL	µg/mL	Abs1	Abs2	Abs3	Mean value	SD			mg/mL	µg/mL	Y1	Y2	Y3	Mean value	SD
1	33.3	0.485	0.486	0.496	0.489	0.00608276			1	33.3	0.133472	0.133745	0.136477	0.134564	0.00166164
VFIII (third collection)		2017-12-14							VFIII (third collection)
MeOH									MeOH
mg/mL	µg/mL	Abs1	Abs2	Abs3	Mean value	SD			mg/mL	µg/mL	Y1	Y2	Y3	Mean value	SD
1	33.3	0.221	0.226	0.222	0.223	0.00264575			1	33.3	0.0613544	0.0627202	0.0616276	0.0619007	0.000722745
Acetone									Acetone
mg/mL	µg/mL	Abs1	Abs2	Abs3	Mean value	SD			mg/mL	µg/mL	Y1	Y2	Y3	Mean value	SD
1	33.3	0.121	0.125	0.12	0.122	0.00264575			1	33.3	0.0340372	0.0351299	0.033764	0.0343104	0.000722745
70% EtOH									70% EtOH
mg/mL	µg/mL	Abs1	Abs2	Abs3	Mean value	SD			mg/mL	µg/mL	Y1	Y2	Y3	Mean value	SD
1	33.3	0.404	0.404	0.408	0.405333	0.0023094			1	33.3	0.111345	0.111345	0.112438	0.111709	0.000630863

## Sheet: Calibration curve gallic acid
Calibration curve Gallic acid
mg/mL		Abs1	Abs2	Abs3	Mean value	SD
0.01		0.037	0.027	0.044	0.036	0.008544
0.015		0.053	0.038	0.049	0.0466667	0.00776745
0.025		0.097	0.101	0.074	0.0906667	0.0145717
0.1		0.373	0.371	0.372	0.372	0.001
0.25		0.895	0.895	0.894	0.894667	0.00057735
0.5		1.704	1.898	1.898	1.83333	0.112006

## Sheet: TFC
Total flavonoid content (TFC)										Quercetin equivalent (QE)
VFI (first collection)									VFI (first collection)
MeOH									MeOH
mg/mL	µg/mL	Abs1	Abs2	Abs3	Mean value	SD			mg/mL	µg/mL	Y1	Y2	Y3	Mean value	SD
1	33.3	0.055	0.064	0.058	0.059	0.00458258			1	33.3	7.39726	8.63014	7.80822	7.94521	0.62775
Acetone									Acetone
mg/mL	µg/mL	Abs1	Abs2	Abs3	Mean value	SD			mg/mL	µg/mL	Y1	Y2	Y3	Mean value	SD
1	33.3	0.258	0.273	0.294	0.275	0.0180831			1	33.3	35.2055	37.2603	40.137	37.5342	2.47714
70% EtOH									70% EtOH
mg/mL	µg/mL	Abs1	Abs2	Abs3	Mean value	SD			mg/mL	µg/mL	Y1	Y2	Y3	Mean value	SD
1	33.3	0.028	0.05	0.029	0.0356667	0.0124231			1	33.3	3.69863	6.71233	3.83562	4.74886	1.70179
VFII (second collection)									VFII (second collection)
MeOH									MeOH
mg/mL	µg/mL	Abs1	Abs2	Abs3	Mean value	SD			mg/mL	µg/mL	Y1	Y2	Y3	Mean value	SD
1	33.3	0.06	0.073	0.089	0.074	0.0145258			1	33.3	8.08219	9.86301	12.0548	10	1.98984
Acetone									Acetone
mg/mL	µg/mL	Abs1	Abs2	Abs3	Mean value	SD			mg/mL	µg/mL	Y1	Y2	Y3	Mean value	SD
1	33.3	0.028	0.026	0.029	0.0276667	0.00152753			1	33.3	3.69863	3.42466	3.83562	3.65297	0.20925
70% EtOH									70% EtOH
mg/mL	µg/mL	Abs1	Abs2	Abs3	Mean value	SD			mg/mL	µg/mL	Y1	Y2	Y3	Mean value	SD
1	33.3	0.032	0.038	0.034	0.0346667	0.00305505			1	33.3	4.24658	5.06849	4.52055	4.61187	0.4185
VFIII (third collection)									VFIII (third collection)
MeOH									MeOH
mg/mL	µg/mL	Abs1	Abs2	Abs3	Mean value	SD			mg/mL	µg/mL	Y1	Y2	Y3	Mean value	SD
1	33.3	0.032	0.04	0.043	0.0383333	0.00568624			1	33.3	4.24658	5.34247	5.75342	5.11416	0.778937
Acetone									Acetone
mg/mL	µg/mL	Abs1	Abs2	Abs3	Mean value	SD			mg/mL	µg/mL	Y1	Y2	Y3	Mean value	SD
1	33.3	0.162	0.2	0.197	0.186333	0.0211266			1	33.3	22.0548	27.2603	26.8493	25.3881	2.89406
70% EtOH									70% EtOH
mg/mL	µg/mL	Abs1	Abs2	Abs3	Mean value	SD			mg/mL	µg/mL	Y1	Y2	Y3	Mean value	SD
1	33.3	0.027	0.046	0.041	0.038	0.00984886			1	33.3	3.56164	6.16438	5.47945	5.06849	1.34916

## Sheet: Calibration curve Quercetin
Quercetin
µg/mL	Abs1	Abs2	Abs3	Mean value	SD
12.5	0.082	0.079	0.089	0.0833333	0.0051316
25	0.195	0.191	0.182	0.189333	0.00665833
50	0.36	0.375	0.385	0.373333	0.0125831
100	0.68	0.762	0.741	0.727667	0.042595

## Sheet: HPLC analysis
				VFIa		VFIm		VFIe		VFIIa		VFIIm		VFIIe		VFIIIa		VFIIIm		VFIIIe
Phenolic compounds	RT (min)	λ (nm)	Calibration curve	ppm	SD	ppm	SD	ppm	SD	ppm	SD	ppm	SD	ppm	SD	ppm	SD	ppm	SD	ppm	SD
Vanillic acid	33	280	y=45793x-75241; R2=0,9994	2.10851	0.0667067	1.64379	1.44377	nd	nd	nd	nd	1.6431	0	nd	nd	nd	nd	1.64307	0.02	nd	nd
Ellagin acid	52	254	y=199956x-154735; R2=0,9971	0.805502	0.0158356	0.818553	0.004042	0.78403	0.00368837	0.782172	2.12179e-05	1.28185	0	0.790979	0	0.802882	0.00768087	1.21025	0.0190218	0.817667	0.00628403
Chlorogenic acid	30	327	y=56518x-652387; R2=0,9103	11.5825	0.0187292	11.5791	0.00126363	11.6409	0	nd	nd	11.7396	0	nd	nd	nd	nd	11.7477	0.0259732	nd	nd
Quercetin	57	365	y=104512x+2E+06; R2=1	4.15582	0.00583888	4.13864	0	nd	nd	4.21794	0	4.16729	0	nd	nd	nd	nd	4.12908	0.0072597	nd	nd
p-cumaric acid	4.8	276	y=94706x-2E+06; R2=0,9955	22.3598	0.362588	25.157	1.17011	22.3424	1.34186	22.8941	0.0207191	27.3968	5.0065	22.7414	2.03458	25.5947	3.53956	22.6753	0.0277449	21.9096	0.775461
Ferulic acid	43	325	y=204513x-4E+06; R2=0,9915	19.5745	0.00245484	19.6417	0.023684	19.8849	0.417913	22.1036	0	19.8342	0.379054	nd		nd	nd	19.9214	0.249353	nd	nd
Gallic acid	5.8	271	y=99385x- 1E+6; R2=0,999	10.3855	0	10.4553	0	10.4775	0.197187	13.8613	0	10.2204	0.0382635	nd	nd	10.3937	0.362941	10.406	0.157807	12.6374	0
Std: Vanillic acid	λ= 280 nm	t=33 min
Calibration curve
ppm	Area1	Area2	mean value	SD
100	4387011	4588627	4487819	142564
50	2263230	2263230	2263230	0
25	1037054	1037054	1037054	0
Sample	Area1	Area2	Mean value	SD		ppm1	ppm2	Mean value ppm	SD
VFIa	19154	23474	21314	3054.7		2.06134	2.15568	2.10851	0.0667067
VFIm	43032	50262	46647	5112.38		2.58277	2.74066	2.66172	0.111641
VFIe	nd	nd	nd	nd		nd	nd	nd	nd
VFIIa	nd	nd	nd	nd		nd	nd	nd	nd
VFIIm	66004	66004	66004	0		nd	nd	3.08442	0
VFIIe	nd	nd	nd	nd		nd	nd	nd	nd
VFIIIa	nd	nd	nd	nd		nd	nd	nd	nd
VFIIIm	52736	51341	52038.5	986.414		2.79468	2.76422	2.77945	0.0215407
VFIIIe	nd	nd	nd	nd		nd	nd	nd	nd
Std: Ellagic acid	λ= 254 nm	t=52 min
Calibration curve
ppm	Area1	Area2	Mean value	SD
100	19686412	19686412	19686412	0
50	10296081	10316610	1.03063e+07	14516.2
25	6535298	2535298	4535298	2.82843e+06
Sample	Area1	Area2	Mean value	SD		ppm1	ppm2	Mean value ppm	SD
VFIa	4091	8569	6330	3166.42		0.794305	0.8167	0.805502	0.0158356
VFIm	9511	8368	8939.5	808.223		0.821411	0.815694	0.818553	0.004042
VFIe	2558	1515	2036.5	737.512		0.786638	0.781422	0.78403	0.00368837
VFIIa	1662	1668	1665	4.24264		0.782157	0.782187	0.782172	2.12179e-05
VFIIm	101578	101578	101578	0		1.28185	1.28185	1.28185	0
VFIIe	3426	3426	3426	0		0.790979	0.790979	0.790979	0
VFIIIa	6892	4720	5806	1535.84		0.808313	0.79745	0.802882	0.00768087
VFIIIm	84573	89952	87262.5	3803.53		1.1968	1.2237	1.21025	0.0190218
VFIIIe	9651	7874	8762.5	1256.53		0.822111	0.813224	0.817667	0.00628403
Std: Chlorogenic acid	λ= 327 nm	t=30 min
Calibration curve
ppm	Area1	Area2	Mean value	SD
100	4500909	4985808	4.74336e+06	342875
50	2841807	3041807	2941807	141421
25	248389	248389	248389	0
Sample	Area1	Area2	Mean value	SD		ppm1	ppm2	Mean value ppm	SD
VFIa	1485	2982	2233.5	1058.54		11.5693	11.5958	11.5825	0.0187292
VFIm	2089	1988	2038.5	71.4178		11.58	11.5782	11.5791	0.00126363
VFIe	5536	5536	5536	0		11.6409	11.6409	11.6409	0
VFIIa	nd	nd	nd	nd		nd	nd	nd	nd
VFIIm	11112	11112	11112	0		11.7396	11.7396	11.7396	0
VFIIe	nd	nd	nd	nd		nd	nd	nd	nd
VFIIIa	nd	nd	nd	nd		nd	nd	nd	nd
VFIIIm	10531	12607	11569	1467.95		11.7293	11.7661	11.7477	0.0259732
VFIIIe	nd	nd	nd	nd		nd	nd	nd	nd
Std: Quercetin	λ= 365 nm	t=57 min
Calibration curve
ppm	Area1	Area2	Mean value	SD
100	10337566	10337566	10337566	0
50	3791248	3889645	3.84045e+06	69577.2
25	2817022	2817022	2817022	0
Sample	Area1	Area2	Mean value	SD		ppm1	ppm2	Mean value ppm	SD
VFIa	3227	2364	2795.5	610.233		4.15995	4.1517	4.15582	0.00583888
VFIm	1000	1000	1000	0		4.13864	4.13864	4.13864	0
VFIe	nd	nd	nd	nd		nd	nd	nd	nd
VFIIa	9287	9287	9287	0		4.21794	4.21794	4.21794	0
VFIIm	3994	3994	3994	0		4.16729	4.16729	4.16729	0
VFIIe	nd	nd	nd	nd		nd	nd	nd	nd
VFIIIa	nd	nd	nd	nd		nd	nd	nd	nd
VFIIIm	4297	3224		758.726		4.17019	4.15992	4.12908	0.0072597
VFIIIe	nd	nd	nd	nd		nd	nd	nd	nd
Std: p-cumaric acid	λ= 276 nm	t=4,8 min
Calibration curve
ppm	Area1	Area2	Mean value	SD
100	7177064	7177064	7177064	0
50	2072700	2072700	2072700	0
25	166366	166366	166366	0
Sample	Area1	Area2	Mean value	SD		ppm1	ppm2	Mean value ppm	SD
VFIa	93323	141886	117604	34339.2		22.1034	22.6162	22.3598	0.362588
VFIm	460881	304163	382522	110816		25.9844	24.3296	25.157	1.17011
VFIe	26100	205822	115961	127083		21.3936	23.2913	22.3424	1.34186
VFIIa	166820	169595	168208	1962.22		22.8794	22.9087	22.8941	0.0207191
VFIIm	259373	929916	594644	474146		23.8567	30.937	27.3968	5.0065
VFIIe	289999	17498	153748	192687		24.1801	21.3027	22.7414	2.03458
VFIIIa	186940	661009	423974	335217		23.0919	28.0976	25.5947	3.53956
VFIIIm	149343	145627	147485	2627.61		22.6949	22.6557	22.6753	0.0277449
VFIIIe	23043	126904	74973.5	73440.8		21.3613	22.458	21.9096	0.775461
Std: Ferulic acid	λ= 325 nm	t=43 min
Calibration curve
ppm	Area1	Area2	Mean value	SD
100	15314535	16980899	16147717	1.1783e+06
50	7017038	7017038	7017038	0
25	535468	535468	535468	0
Sample	Area1	Area2	Mean value	SD		ppm1	ppm2	Mean value ppm	SD
VFIa	2889	3599	3244	502.046		19.5728	19.5763	19.5745	0.00245484
VFIm	20415	13565	16990	4843.68		19.6585	19.625	19.6417	0.023684
VFIe	6287	127158	66722.5	85468.7		19.5894	20.1804	19.8849	0.417913
VFIIa	520464	520464	520464	0		22.1036	22.1036	22.1036	0
VFIIm	1536	111168	56352	77521.5		19.5662	20.1022	19.8342	0.379054
VFIIe	nd	nd	nd	nd		nd	nd	nd	nd
VFIIIa	nd	nd	nd	nd		nd	nd	nd	nd
VFIIIm	38135	110254	74194.5	50995.8		19.7451	20.0978	19.9214	0.249353
VFIIIe	nd	nd	nd	nd		nd	nd	nd	nd
Std: Gallic acid	λ= 271 nm	t=6 min
Calibration curve
ppm	Area1	Area2	Mean value	SD
100	8494892	8494892	8494892	0
50	3478772	3478772	3478772	0
25	1052756	1052756	1052756	0
Sample	Area1	Area2	Mean value	SD		ppm1	ppm2	Mean value ppm	SD
VFIa	32164	32164	32164	0		10.3855	10.3855	10.3855	0
VFIm	39097	39097	39097	0		10.4553	10.4553	10.4553	0
VFIe	55164	27449	41306.5	19597.5		10.6169	10.3381	10.4775	0.197187
VFIIa	377608	377608	377608	0		13.8613	13.8613	13.8613	0
VFIIm	18447	13069	15758	3802.82		10.2475	10.1934	10.2204	0.0382635
VFIIe	nd	nd	nd	nd		nd	nd	nd	nd
VFIIIa	7475	58487	32981	36070.9		10.1371	10.6504	10.3937	0.362941
VFIIIm	45294	23114	34204	15683.6		10.5176	10.2945	10.406	0.157807
VFIIIe	255968	255968	255968	0		12.6374	12.6374	12.6374	0

## Sheet: DPPH value
Antioxidant activity: DPPH												% inhibition of DPPH									TEAC
									VFI (first collection)										VFI (first collection)
VFI (first collection)																			µgTE
MeOH									%IDPPH	MeOH						EC50	SD			MeOH
mg/mL	µg/mL	Abs0	Abs1	Abs2	Abs3	Mean value	SD			Abs0	Abs1	Abs2	Abs3	Mean value	SD	2.522	0.4			Abs1	Abs2	Abs3	Mean value	SD
1	33.3	0.405	0.026	0.027	0.022	0.025	0.00264575			0.405	93.5802	93.3333	94.5679	93.8272	0.653272					227.429	226.714	230.286	228.143	1.88982
0.5	16.67	0.405	0.054	0.052	0.058	0.0546667	0.00305505			0.405	86.6667	87.1605	85.679	86.5021	0.754333					207.429	208.857	204.571	206.952	2.18218
0.1	3.33	0.405	0.136	0.14	0.132	0.136	0.004			0.405	66.4198	60.123	67.4074	64.6501	3.95152					148.857	146	151.714	148.857	2.85714
0.05	1.67	0.405	0.274	0.279	0.275	0.276	0.00264575			0.405	32.3457	31.1111	32.0988	31.8519	0.653272					50.2857	46.7143	49.5714	48.8571	1.88982
Acetone									%IDPPH	Acetone						EC50	SD			Acetone
mg/mL	µg/mL	Abs0	Abs1	Abs2	Abs3	Mean value	SD			Abs0	Abs1	Abs2	Abs3	Mean value	SD	7.882	0.8			Abs1	Abs2	Abs3	Mean value	SD
1	33.3	0.43	0.034	0.036	0.036	0.0353333	0.0011547			0.43	92.093	91.6279	91.6279	91.7829	0.268535					221.714	220.286	220.286	220.762	0.824786
0.5	16.67	0.43	0.138	0.146	0.136	0.14	0.0052915			0.43	67.907	66.0465	68.3721	67.4419	1.23058					147.429	141.714	148.857	146	3.77964
0.1	3.33	0.43	0.33	0.333	0.335	0.332667	0.00251661			0.43	26	22.5581	22.093	23.5504	2.13414					10.2857	8.14286	6.71429	8.38095	1.79758
0.05	1.67	0.43	0.366	0.363	0.363	0.364	0.00173205			0.43	14.8837	15.5814	15.5814	15.3488	0.402803					0	0	0	0	0
70% EtOH									%IDPPH	70% EtOH						EC50	SD			70% EtOH
mg/mL	µg/mL	Abs0	Abs1	Abs2	Abs3	Mean value	SD			Abs0	Abs1	Abs2	Abs3	Mean value	SD	3.233	0.5			Abs1	Abs2	Abs3	Mean value	SD
1	33.3	0.412	0.033	0.039	0.032	0.0346667	0.00378594			0.412	91.9903	90.534	92.233	91.5858	0.918917					222.429	218.143	223.143	221.238	2.70424
0.5	16.67	0.412	0.05	0.051	0.052	0.051	0.001			0.412	87.8641	87.6214	87.3786	87.6214	0.242718					210.286	209.571	208.857	209.571	0.714286
0.1	3.33	0.412	0.203	0.208	0.211	0.207333	0.00404145			0.412	50.7282	49.5146	48.7864	49.6764	0.980935					101	97.4286	95.2857	97.9048	2.88675
0.05	1.67	0.412	0.266	0.278	0.279	0.274333	0.00723418			0.412	33.43	32.5243	32.2816	32.7453	0.60528					56	47.4286	46.7143	50.0476	5.16727
VFII (second collection)									VFII (second collection)										VFII (second collection)
MeOH									%IDPPH	MeOH						EC50	SD		µgTE	MeOH
mg/mL	µg/mL	Abs0	Abs1	Abs2	Abs3	Mean value	SD			Abs0	Abs1	Abs2	Abs3	Mean value	SD	18.2	1.3			Abs1	Abs2	Abs3	Mean value	SD
1	33.3	0.427	0.168	0.177	0.165	0.17	0.006245			0.427	60.6557	58.548	61.3583	60.1874	1.46253					126	119.571	128.143	124.571	4.46071
0.5	16.67	0.427	0.217	0.229	0.233	0.226333	0.00832666			0.427	49.1803	46.37	45.4333	46.9945	1.95004					91	82.4286	79.5714	84.3333	5.94762
0.1	3.33	0.427	0.34	0.343	0.346	0.343	0.003			0.427	20.3747	19.6721	18.9696	19.6721	0.702576					3.14286	1	0	1.38095	1.60569
0.05	1.67	0.427	0.376	0.37	0.374	0.373333	0.00305505			0.427	11.9438	12.99	12.4122	12.4487	0.524056					0	0	0	0	0
Acetone									%IDPPH	Acetone						EC50	SD			Acetone
mg/mL	µg/mL	Abs0	Abs1	Abs2	Abs3	Mean value	SD			Abs0	Abs1	Abs2	Abs3	Mean value	SD	10.88	1		µgTE	Abs1	Abs2	Abs3	Mean value	SD
1	33.3	0.427	0.1	0.101	0.104	0.101667	0.00208167			0.427	79.13	76.3466	75.644	77.0402	1.84359					174.571	173.857	171.714	173.381	1.4869
0.5	16.67	0.427	0.222	0.227	0.227	0.225333	0.00288675			0.427	48.0094	46.8384	46.8384	47.2287	0.676054					87.4286	83.8571	83.8571	85.0476	2.06197
0.1	3.33	0.427	0.263	0.256	0.256	0.258333	0.00404145			0.427	38.4075	40.0468	40.0468	39.5004	0.946476					58.1429	63.1429	63.1429	61.4762	2.88675
0.05	1.67	0.427	0.376	0.363	0.374	0.371	0.007			0.427	11.9438	14.9883	12.4122	13.1148	1.63934					0	0	0	0	0
70% EtOH									%IDPPH	70% EtOH						EC50	SD			70% EtOH
mg/mL	µg/mL	Abs0	Abs1	Abs2	Abs3	Mean value	SD			Abs0	Abs1	Abs2	Abs3	Mean value	SD	4.15	0.6			Abs1	Abs2	Abs3	Mean value	SD
1	33.3	0.415	0.04	0.037	0.04	0.039	0.00173205			0.415	90.3614	91.0843	90.3614	90.6024	0.417362					217.429	219.571	217.429	218.143	1.23718
0.5	16.67	0.415	0.056	0.046	0.05	0.0506667	0.00503322			0.415	86.506	88.9157	87.9518	87.7912	1.21282					206	213.143	210.286	209.81	3.59516
0.1	3.33	0.415	0.236	0.231	0.234	0.233667	0.00251661			0.415	43.49	44.3373	43.6145	43.8139	0.457541					77.4286	81	78.8571	79.0952	1.79758
0.05	1.67	0.415	0.336	0.316	0.31	0.320667	0.0136137			0.415	19.0361	23.8554	25.3012	22.7309	3.28041					6	20.2857	24.5714	16.9524	9.72408
VFIII (third collection)									VFIII (third collection)										VFIII (third collection)
Acetone									%IDPPH	Acetone									µgTE	Acetone
mg/mL	µg/mL	Abs0	Abs1	Abs2	Abs3	Mean value	SD			Abs0	Abs1	Abs2	Abs3	Mean value	SD	EC50	SD			Abs1	Abs2	Abs3	Mean value	SD
1	33.3333	0.4	0.217	0.217	0.217	0.217	0			0.4	45.75	45.75	45.75	45.75	0	39.65	1.6			91	91	91	91	0
0.5	16.6667	0.4	0.291	0.291	0.294	0.292	0.00173205			0.4	27.25	27.25	26.5	27	0.433013					38.1429	38.1429	36	37.4286	1.23718
0.1	3.33333	0.4	0.344	0.344	0.367	0.351667	0.0132791			0.4	14	14	13	13.6667	0.57735					0.285714	0.285714	0	0.190476	0.164957
0.05	1.66667	0.4	0.373	0.373	0.377	0.374333	0.0023094			0.4	6.75	6.75	5.75	6.41667	0.57735					0	0	0	0	0
MeOH									%IDPPH	MeOH						EC50	SD			MeOH
mg/mL	µg/mL	Abs0	Abs1	Abs2	Abs3	Mean value	SD			Abs0	Abs1	Abs2	Abs3	Mean value	SD	35.13	1.5			Abs1	Abs2	Abs3	Mean value	SD
1	33.3	0.4	0.212	0.217	0.217	0.215333	0.00288675			0.4	47	45.75	45.75	46.1667	0.721688					94.5714	91	91	92.1905	2.06197
0.5	16.67	0.4	0.27	0.27	0.271	0.270333	0.00057735			0.4	32.5	32.5	32.25	32.4167	0.144338					53.1429	53.1429	52.4286	52.9048	0.412393
0.1	3.33	0.4	0.336	0.331	0.336	0.334333	0.00288675			0.4	16	17.25	16	16.4167	0.721688					6	9.57143	6	7.19048	2.06197
0.05	1.67	0.4	0.388	0.386	0.383	0.385667	0.00251661			0.4	3	3.5	4.25	3.58333	0.629153					0	0	0	0	0
70% EtOH									%IDPPH	70% EtOH						EC50	SD			70% EtOH
mg/mL	µg/mL	Abs0	Abs1	Abs2	Abs3	Mean value	SD			Abs0	Abs1	Abs2	Abs3	Mean value	SD	21.49	1.2			Abs1	Abs2	Abs3	Mean value	SD
1	33.3	0.4	0.149	0.139	0.146	0.144667	0.0051316			0.4	62.75	65.25	63.5	63.8333	1.2829					139.571	146.714	141.714	142.667	3.66543
0.5	16.67	0.4	0.232	0.24	0.241	0.237667	0.00493288			0.4	42	40	39.75	40.5833	1.23322					80.2857	74.5714	73.8571	76.2381	3.52349
0.1	3.33	0.4	0.344	0.344	0.346	0.344667	0.0011547			0.4	14	14	13.5	13.8333	0.288675					0.285714	0.285714	0	0.190476	0.164957
0.05	1.67	0.4	0.372	0.374	0.37	0.372	0.002			0.4	7	6.5	7.5	7	0.5					0	0	0	0	0
	EC50	SD
Trolox	0.84	0.3																		Trolox
																				Mean value	SD
																				100	0.2
																				99.1	0.1
																				96.7	0.1
																				73.5	0.5

## Sheet: Calibration curve DPPH-Trolox
Calibration curve DPPH-TROLOX
								%I DPPH
µg/mL	Abs0	Abs1	Abs2	Abs3	Mean value	SD		µg/mL	Abs1	Abs2	Abs3	Mean value	SD
250	0.408	0.011	0.011	0.011	0.011	2.12459e-18		250	97.3039	97.3039	97.3039	97.3039	0
125	0.408	0.158	0.158	0.154	0.156667	0.0023094		125	61.2745	61.2745	62.2549	61.6013	0.56603
50	0.408	0.269	0.262	0.267	0.266	0.00360555		50	34.0686	35.7843	34.5588	34.8039	0.883714
25	0.408	0.306	0.306	0.305	0.305667	0.00057735		25	25	25	25.2451	25.0817	0.141507
10	0.408	0.325	0.325	0.323	0.324333	0.0011547		10	20.3431	20.3431	20.8333	20.5065	0.283015
1	0.4	0.34	0.337	0.34	0.339	0.00173205		1	15	15.75	15	15.25	0.433013
0.1	0.394	0.345	0.346	0.345	0.345333	0.00057735		0.1	12.4365	12.1827	12.4365	12.3519	0.146536
0.01	0.394	0.372	0.375	0.37	0.372333	0.00251661		0.01	5.58376	4.82234	6.09137	5.49915	0.638734
µg/mL	Mean ABS
250	0.011
125	0.157
50	0.266
25	0.306
10	0.324
1	0.339
0.1	0.346
0.01	0.372

## Sheet: ABTS value
Antioxidant activity: ABTS+.											% Inhibition of ABTS											TEAC																			10
																																									5
VFI (first collection)									VFI (first collection)										VFI (first collection)																						1
Acetone									%IABTS	Acetone						EC50	SD			µgTE	Acetone																				0.5
mg/mL	µg/mL	Abs0	Abs1	Abs2	Abs3	Mean value	SD		µg/mL	Abs0	Abs1	Abs2	Abs3	Mean value	SD	24.4	1.4		µg/mL	Abs1	Abs2	Abs3	Mean value	SD
1	10	0.716	0.506	0.5	0.507	0.504333	0.00378594		10	0.716	29.3296	30.33	29.1899	29.6165	0.621827				10	2.12219	2.1865	2.11147	2.14005	0.0405781
0.5	5	0.716	0.605	0.603	0.606	0.604667	0.00152753		5	0.716	15.5028	15.7821	15.3631	15.5493	0.213342				5	1.06109	1.08253	1.05038	1.06467	0.0163722
0.1	1	0.716	0.669	0.662	0.666	0.665667	0.00351188		1	0.716	6.56425	7.5419	6.98324	7.0298	0.490487				1	0.375134	0.450161	0.407288	0.410861	0.0376408
0.05	0.5	0.716	0.709	0.716	0.716	0.713667	0.00404145		0.5	0.716	0.977654	0	0	0.325885	0.564449				0.5	-0.0535906	-0.128617	-0.128617	-0.103608	0.0433167
MeOH									%IABTS	MeOH						EC50	SD				MeOH
mg/mL	µg/mL	Abs0	Abs1	Abs2	Abs3	Mean value	SD		µg/mL	Abs0	Abs1	Abs2	Abs3	Mean value	SD	6.8	0.8		µg/mL	Abs1	Abs2	Abs3	Mean value	SD
1	10	0.716	0.194	0.196	0.196	0.195333	0.0011547		10	0.716	72.905	72.6257	72.6257	72.7188	0.161271				10	5.46624	5.4448	5.4448	5.45195	0.0123762
0.5	5	0.722	0.503	0.496	0.491	0.496667	0.00602771		5	0.722	30.3324	31.3019	31.9945	31.2096	0.834863				5	2.15434	2.22937	2.28296	2.22222	0.0646057
0.1	1	0.722	0.65	0.652	0.652	0.651333	0.0011547		1	0.722	9.9723	9.69529	9.69529	9.78763	0.159931				1	0.578778	0.557342	0.557342	0.564487	0.0123762
0.05	0.5	0.722	0.68	0.677	0.678	0.678333	0.00152753		0.5	0.722	5.81717	6.23269	6.09418	6.04801	0.211569				0.5	0.257235	0.289389	0.278671	0.275098	0.0163722
EtOH 70%									%IABTS	EtOH 70%						EC50	SD				EtOH 70%
mg/mL	µg/mL	Abs0	Abs1	Abs2	Abs3	Mean value	SD		µg/mL	Abs0	Abs1	Abs2	Abs3	Mean value	SD	3.8	0.6		µg/mL	Abs1	Abs2	Abs3	Mean value	SD
1	10	0.723	0.078	0.083	0.083	0.0813333	0.00288675		10	0.723	90.77	88.5201	88.5201	89.27	1.29901				10	6.70954	6.65595	6.65595	6.67381	0.0309405
0.5	5	0.723	0.355	0.356	0.358	0.356333	0.00152753		5	0.723	50.899	50.7607	50.4841	50.7146	0.211276				5	3.74062	3.7299	3.70847	3.72633	0.0163722
0.1	1	0.723	0.612	0.615	0.615	0.614	0.00173205		1	0.723	15.3527	14.9378	14.9378	15.0761	0.239564				1	0.986066	0.953912	0.953912	0.96463	0.0185643
0.05	0.5	0.723	0.695	0.698	0.694	0.695667	0.00208167		0.5	0.723	3.87275	3.45781	4.01107	3.78054	0.287921				0.5	0.096463	0.0643087	0.107181	0.0893176	0.0223115
VFII (second collection)									VFII (second collection)										VFII (second collection)
Acetone									%IABTS	Acetone						EC50	SD		µg/mL	µgTE	Acetone
mg/mL	µg/mL	Abs0	Abs1	Abs2	Abs3	Mean value	SD		µg/mL	Abs0	Abs1	Abs2	Abs3	Mean value	SD	40.7	1.6		10	Abs1	Abs2	Abs3	Mean value	SD
1	10	0.723	0.606	0.602	0.603	0.603667	0.00208167		10	0.723	16.1826	16.7358	16.5975	16.5053	0.287921				5	1.05038	1.09325	1.08253	1.07538	0.0223115
0.5	5	0.723	0.612	0.611	0.613	0.612	0.001		5	0.723	15.3527	15.491	15.2144	15.3527	0.138313				1	0.986066	0.996785	0.975348	0.986066	0.0107181
0.1	1	0.723	0.686	0.69	0.687	0.687667	0.00208167		1	0.723	5.11757	4.56432	4.97925	4.88704	0.287921				0.5	0.192926	0.150054	0.182208	0.175063	0.0223115
0.05	0.5	0.723	0.702	0.694	0.698	0.698	0.004		0.5	0.723	2.90456	3.011	3.45781	3.12446	0.293558					0.0214362	0.107181	0.0643087	0.0643087	0.0428725
MeOH									%IABTS	MeOH						EC50	SD				MeOH
mg/mL	µg/mL	Abs0	Abs1	Abs2	Abs3	Mean value	SD		µg/mL	Abs0	Abs1	Abs2	Abs3	Mean value	SD	47.1	1.7		µg/mL	Abs1	Abs2	Abs3	Mean value	SD
1	10	0.721	0.609	0.609	0.608	0.608667	0.00057735		10	0.721	15.534	15.534	15.6727	15.5802	0.0800763				10	1.01822	1.01822	1.02894	1.02179	0.00618811
0.5	5	0.729	0.633	0.634	0.634	0.633667	0.00057735		5	0.729	13.1687	13.0316	13.0316	13.0773	0.0791976				5	0.760986	0.750268	0.750268	0.753841	0.00618811
0.1	1	0.729	0.712	0.723	0.727	0.720667	0.00776745		1	0.729	1.33	0.823	0.274348	0.809116	0.527963				1	-0.0857449	-0.203644	-0.246517	-0.178635	0.0832524
0.05	0.5	0.729	0.716	0.719	0.719	0.718	0.00173205		0.5	0.729	1.78326	1.37174	1.37174	1.50892	0.237593				0.5	-0.128617	-0.160772	-0.160772	-0.150054	0.0185643
EtOH 70%									%IABTS	EtOH 70%						EC50	SD				EtOH 70%
mg/mL	µg/mL	Abs0	Abs1	Abs2	Abs3	Mean value	SD		µg/mL	Abs0	Abs1	Abs2	Abs3	Mean value	SD	12.3	1.1		µg/mL	Abs1	Abs2	Abs3	Mean value	SD
1	10	0.721	0.39	0.391	0.391	0.390667	0.00057735		10	0.721	45.9085	45.7698	45.7698	45.816	0.0800763				10	3.36549	3.35477	3.35477	3.35834	0.00618811
0.5	5	0.721	0.508	0.51	0.508	0.508667	0.0011547		5	0.721	29.5423	29.2649	29.5423	29.4498	0.160153				5	2.10075	2.07931	2.10075	2.0936	0.0123762
0.1	1	0.721	0.69	0.689	0.698	0.692333	0.00493288		1	0.721	3.409	4.43828	3.19001	3.6791	0.666526				1	0.150054	0.160772	0.0643087	0.125045	0.0528712
0.05	0.5	0.721	0.7	0.71	0.704	0.704667	0.00503322		0.5	0.721	2.91262	1.52566	2.35784	2.26537	0.698089				0.5	0.0428725	-0.0643087	0	-0.00714541	0.0539467
VFIII (third collection)									VFIII (third collection)										VFIII (third collection)
Acetone									%IABTS	Acetone						EC50	SD			µgTE	Acetone
mg/mL	µg/mL	Abs0	Abs1	Abs2	Abs3	Mean value	SD		µg/mL	Abs0	Abs1	Abs2	Abs3	Mean value	SD	70.8	1.8		µg/mL	Abs1	Abs2	Abs3	Mean value	SD
1	10	0.729	0.647	0.646	0.634	0.642333	0.00723418		10	0.729	11.2483	11.3855	13.0316	11.8884	0.992343				10	0.610932	0.621651	0.750268	0.66095	0.0775367
0.5	5	0.729	0.681	0.676	0.676	0.677667	0.00288675		5	0.729	6.58436	7.27023	7.27023	7.04161	0.395988				5	0.246517	0.300107	0.300107	0.282244	0.0309405
0.1	1	0.729	0.704	0.705	0.704	0.704333	0.00057735		1	0.729	3.42936	3.29218	3.42936	3.38363	0.0791976				1	0	-0.0107181	0	-0.0035727	0.00618811
0.05	0.5	0.729	0.723	0.727	0.727	0.725667	0.0023094		0.5	0.729	0.823045	0.274348	0.274348	0.457247	0.31679				0.5	-0.203644	-0.246517	-0.246517	-0.232226	0.0247524
MeOH									%IABTS	MeOH						EC50	SD			µgTE	MeOH
mg/mL	µg/mL	Abs0	Abs1	Abs2	Abs3	Mean value	SD		µg/mL	Abs0	Abs1	Abs2	Abs3	Mean value	SD	38.6	1.6		µg/mL	Abs1	Abs2	Abs3	Mean value	SD
1	10	0.723	0.596	0.589	0.598	0.594333	0.00472582		10	0.723	17.5657	18.5339	17.2891	17.7962	0.65364				10	1.15756	1.23258	1.13612	1.17542	0.0506518
0.5	5	0.723	0.61	0.608	0.608	0.608667	0.0011547		5	0.723	15.6293	15.9059	15.9059	15.8137	0.15971				5	1.0075	1.02894	1.02894	1.02179	0.0123762
0.1	1	0.723	0.685	0.703	0.703	0.697	0.0103923		1	0.723	3.255	2.76625	2.76625	2.92917	0.282179				1	0.203644	0.0107181	0.0107181	0.0750268	0.111386
0.05	0.5	0.723	0.71	0.712	0.71	0.710667	0.0011547		0.5	0.723	1.79806	1.52144	1.79806	1.70586	0.15971				0.5	-0.0643087	-0.0857449	-0.0643087	-0.0714541	0.0123762
EtOH 70%									%IABTS	EtOH 70%						EC50	SD			µgTE	EtOH 70%
mg/mL	µg/mL	Abs0	Abs1	Abs2	Abs3	Mean value	SD		µg/mL	Abs0	Abs1	Abs2	Abs3	Mean value	SD	12.9	1.1		µg/mL	Abs1	Abs2	Abs3	Mean value	SD
1	10	0.716	0.393	0.395	0.393	0.393667	0.0011547		10	0.716	45.1117	44.8324	45.1117	45.0186	0.161271				10	3.33333	3.3119	3.33333	3.32619	0.0123762
0.5	5	0.716	0.516	0.517	0.513	0.515333	0.00208167		5	0.716	27.933	27.7933	28.352	28.0261	0.290735				5	2.01501	2.00429	2.04716	2.02215	0.0223115
0.1	1	0.716	0.69	0.669	0.669	0.676	0.0121244		1	0.716	3.63128	3.56	3.56	3.27	0.0411564				1	0.150054	0.375134	0.375134	0.300107	0.12995
0.05	0.5	0.716	0.69	0.704	0.702	0.698667	0.00757188		0.5	0.716	2.63	1.67598	1.95531	2.08709	0.490475				0.5	0.150054	0	0.0214362	0.0571633	0.0811562
									Trolox	Mean value	SD
									10	99.04	0.41
									5	84.52	1.66
									1	18.81	0.64
									0.5	10.73	0.21

## Sheet: Calibration curve ABTS-Trolox
ABTS ASSAY
									%IABTS
mg/mL	µg /mL	Abs0	ABS 1	ABS 2	ABS3	Mean value	SD		µg /mL		ABS 1	ABS 2	ABS3	Mean value	SD
0.001	0.01	0.73	0.72	0.726	0.715	0.720333	0.00550757		0.01		1.36986	0.547945	2.05479	1.3242	0.754462
0.01	0.1	0.73	0.691	0.705	0.699	0.698333	0.00702377		0.1		5.34247	3.42466	4.24658	4.3379	0.96216
0.05	0.5	0.73	0.65	0.652	0.653	0.651667	0.00152753		0.5		10.9589	10.6849	10.5479	10.7306	0.20925
0.1	1	0.73	0.589	0.591	0.598	0.592667	0.00472582		1		19.3151	19.0411	18.0822	18.8128	0.647372
0.5	5	0.73	0.1	0.115	0.124	0.113	0.0121244		5		86.3014	84.2466	83.0137	84.5205	1.66087
0.75	7.5	0.73	0.007	0.01	0.004	0.007	0.003		7.5		99.0411	98.6301	99.4521	99.0411	0.410959
		µg /mL	Mean value
		0.01	0.72
		0.1	0.698
		0.5	0.652
		1	0.593
		7.5	0.007
